# Supplementary material for: Course of Vitamin D Levels in Newly Diagnosed Non-Metastatic Breast Cancer Patients over One Year with Quarterly Controls and Substitution
Source: MDPI journal article supplement (doi:10.3390/nu16060854), 2024-03-15
Supplement: s1 [file s1]

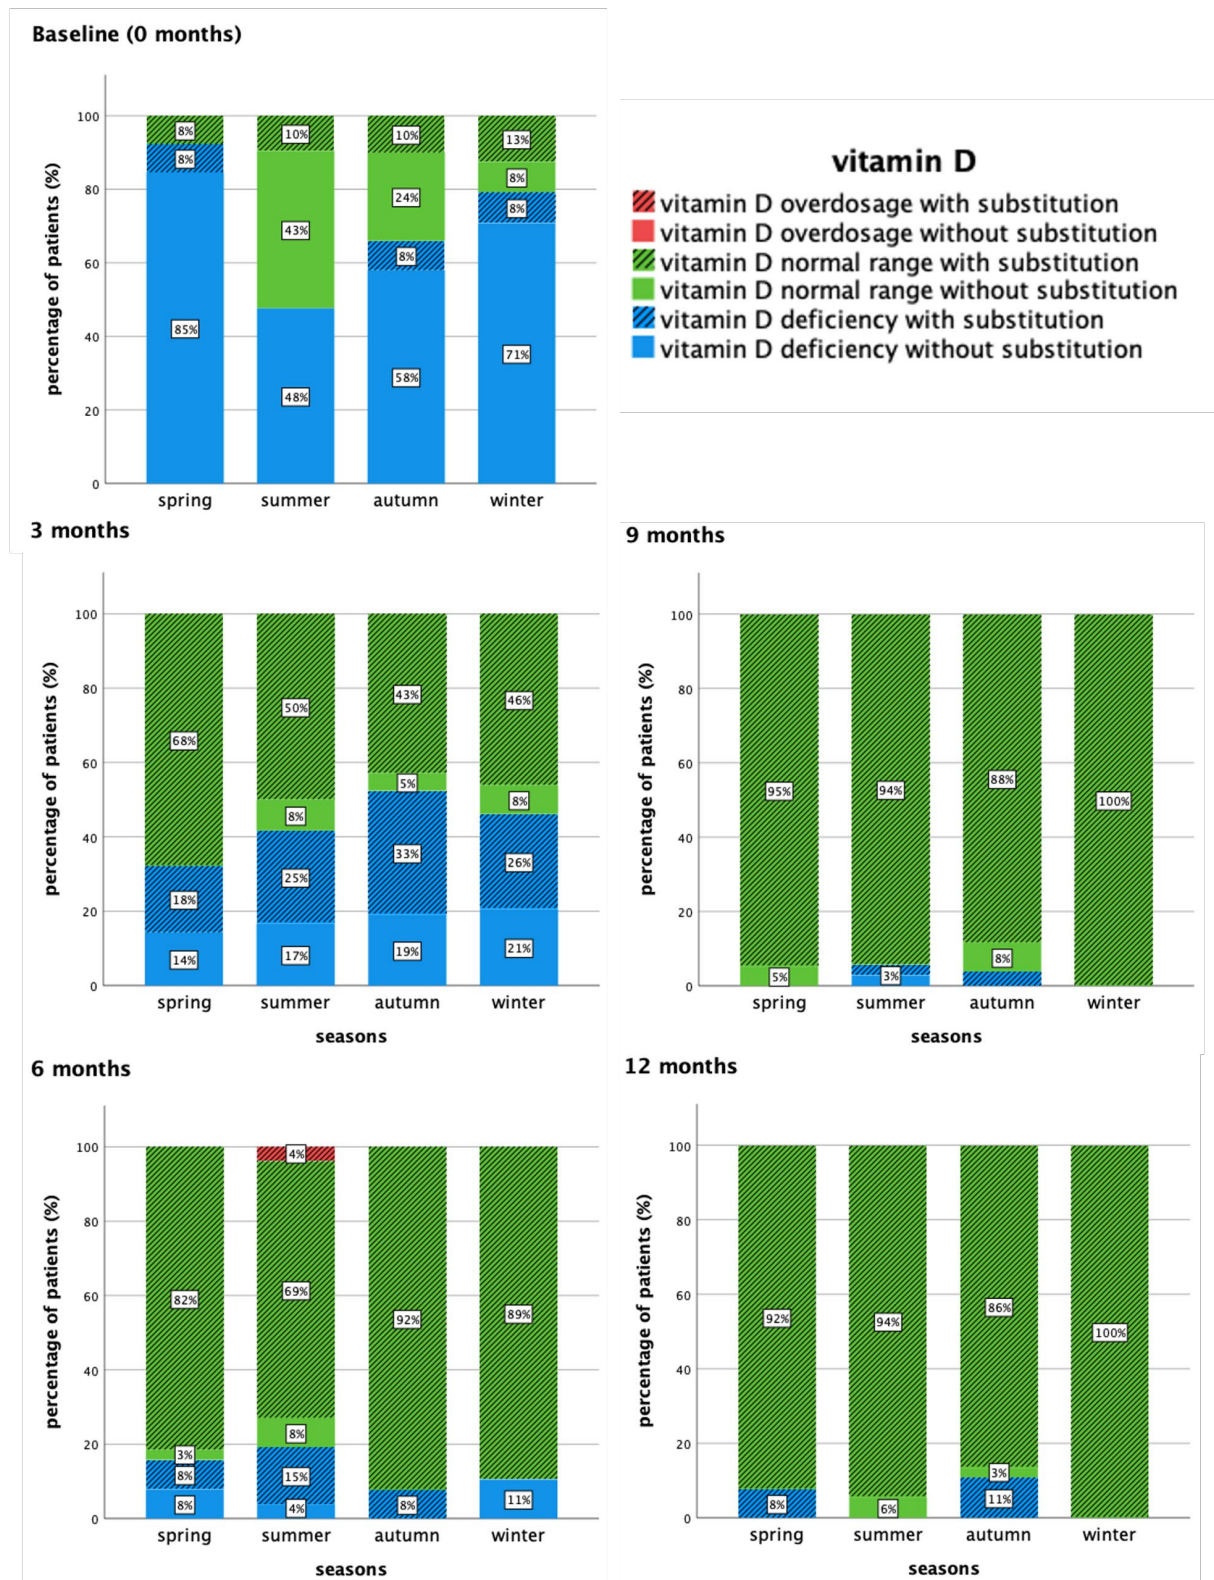

**Supplementary Figure S1.** Vitamin D serum levels throughout the year (0, 3, 6, 9, 12 months), considering the seasons and substitution of vitamin D.
